## **Evolution of embryo implantation was enabled by the origin of decidual cells in eutherian mammals**

Arun R. Chavan<sup>1,2,\*</sup>, Oliver W. Griffith<sup>1,2</sup>, Daniel Stadtmayer<sup>1,2</sup>, Jamie Maziarz<sup>1,2</sup>, Mihaela Pavlicev<sup>3</sup>, Ruth Fishman<sup>4</sup>, Lee Koren<sup>4</sup>, Roberto Romero<sup>6,7</sup>, Günter P. Wagner<sup>1,2,5,6,\*</sup>

<sup>1</sup> Department of Ecology and Evolutionary Biology, Yale University, New Haven, CT, USA

<sup>2</sup> Yale Systems Biology Institute, Yale University, West Haven, CT, USA

<sup>3</sup> Cincinnati Children's Hospital, Cincinnati, OH, USA

<sup>4</sup> The Mina and Everard Goodman Faculty of Life Sciences, Bar-Ilan University, Ramat-Gan, Israel

<sup>5</sup> Department of Obstetrics, Gynecology, and Reproductive Science, Yale Medical School, New Haven, CT, USA

<sup>6</sup> Department of Obstetrics and Gynecology, Wayne State University, Detroit, MI, USA

<sup>7</sup> Perinatology Research Branch, Division of Obstetrics and Maternal-Fetal Medicine, Division of Intramural Research, Eunice Kennedy Shriver National Institute of Child Health and Human Development, National Institutes of Health, Detroit, MI, USA

\* Correspondence to: [arun.chavan@yale.edu](mailto:arun.chavan@yale.edu) and [gunter.wagner@yale.edu](mailto:gunter.wagner@yale.edu)

## 1 **Abstract**

2 Embryo implantation is the first step in the establishment of pregnancy in eutherian (Placental)  
3 mammals. Although viviparity evolved prior to the common ancestor of marsupials and  
4 eutherian mammals (therian ancestor), implantation is unique to eutherians. The ancestral therian  
5 pregnancy likely involved a short phase of attachment between the fetal and maternal tissues  
6 followed by parturition rather than implantation, similar to the mode of pregnancy found in  
7 marsupials such as the opossum. Embryo implantation in eutherian mammals as well as embryo  
8 attachment in opossum, induce a homologous inflammatory response in the uterus. Here, we  
9 elucidate the evolutionary mechanism by which the ancestral inflammatory fetal-maternal  
10 attachment was transformed into the process of implantation. We performed a comparative  
11 transcriptomic and immunohistochemical study of the gravid and non-gravid uteri of two  
12 eutherian mammals, armadillo (*Dasypus novemcinctus*) and hyrax (*Procavia capensis*); a  
13 marsupial outgroup, opossum (*Monodelphis domestica*); and compared it to previously published  
14 data on rabbit (*Oryctolagus cuniculus*). This taxon sampling allows inference of the eutherian  
15 ancestral state. Our results show that in the eutherian lineage, the ancestral inflammatory  
16 response was domesticated by suppressing a detrimental component *viz.* signaling by the  
17 cytokine IL17A, while retaining components that are beneficial to placentation, *viz.*  
18 angiogenesis, vascular permeability, remodeling of extracellular matrix. IL17A mediates  
19 recruitment of neutrophils to inflamed mucosal tissues, which, if unchecked, can damage the  
20 uterus as well as the embryo and lead to expulsion of the fetus. We hypothesized that the uterine  
21 decidual stromal cells, which evolved coincidentally with embryo implantation, evolved, in part,  
22 to prevent IL17A-mediated neutrophil infiltration. We tested a prediction of this hypothesis *in*  
23 *vitro*, and showed that decidual stromal cells can suppress differentiation of human naïve T cells  
24 into IL17A-producing Th17 cells. Together, these results provide a mechanistic understanding of  
25 early stages of the evolution of the eutherian mode of pregnancy, and also identify a potentially  
26 ancestral function of an evolutionary novelty, the decidual stromal cell-type.

## 27 **Introduction**

28 Embryo implantation is the process by which the blastocyst establishes a sustained fetal-maternal  
29 interface for the maintenance of pregnancy. It begins with apposition of the blastocyst to  
30 endometrial luminal epithelium, followed by its attachment via molecular interactions, and, in  
31 many eutherian species, invasion of the endometrium to establish a direct contact with the  
32 endometrial connective tissue and vasculature (Mossman 1937, Enders and Schlafke 1969,  
33 Schlafke and Enders 1975, Ashary, Tiwari et al. 2018). Implantation is one of the most critical  
34 steps in the establishment of a successful pregnancy, but it only occurs in eutherian mammals  
35 (also known as Placental mammals). Mammalian viviparity originated before the common  
36 ancestor of eutherian mammals and marsupials, i.e. in the stem lineage of therian mammals.  
37 However, marsupial and eutherian pregnancies are different in many fundamental ways,  
38 including embryo implantation.

39 Marsupial pregnancy is very short — in most cases shorter than the ovarian cycle (Renfree 1994,  
40 McAllan 2011). For most of the duration of marsupial pregnancy, the embryo is present inside of  
41 an eggshell (Selwood 2000, Griffith, Chavan et al. 2017) that precludes a direct physical contact  
42 between the fetal and maternal tissues. Towards the end of the pregnancy, the eggshell breaks  
43 down and the fetal membranes attach to the uterine luminal epithelium. The phase of attachment  
44 lasts a short fraction of the length of gestation, and is soon followed by the birth of highly  
45 altricial neonates. For instance, pregnancy in the South American marsupial, the grey short-tailed  
46 opossum (*Monodelphis domestica*), lasts 14.5 days. Embryo attachment begins approximately on  
47 the 12<sup>th</sup> day post-copulation (dpc) and induces an acute inflammatory response in the uterus  
48 (Griffith, Chavan et al. 2017). This inflammation is presumably why embryo attachment  
49 precipitates parturition rather than implantation (Chavan, Griffith et al. 2017, Hansen, Faber et  
50 al. 2017).

51 Puzzlingly, in many eutherian mammals such as human, mouse, pig, and sheep, embryo  
52 implantation also shows signs of an inflammatory reaction; some of these inflammatory  
53 processes are in fact necessary and beneficial for a successful implantation (Keys, King et al.  
54 1986, Barash, Dekel et al. 2003, Waclawik and Ziecik 2007, Plaks, Birnberg et al. 2008, Mor,  
55 Cardenas et al. 2011, Dekel, Gnainsky et al. 2014, Robertson and Moldenhauer 2014, Chavan,  
56 Griffith et al. 2017, Whyte, Meyer et al. 2017). Resemblance of the physiological process of  
57 implantation to an inflammatory reaction appears paradoxical at first because inflammation in  
58 later stages of pregnancy leads to the termination of pregnancy. However, analysis of the  
59 evolutionary history of embryo implantation suggests that this resemblance is due to the  
60 evolutionary roots of implantation in an inflammatory response to embryo attachment (Finn  
61 1986, Griffith, Chavan et al. 2017). Griffith and colleagues (Griffith, Chavan et al. 2017,  
62 Griffith, Chavan et al. 2018) argued, based on a comparison of embryo attachment in opossum to  
63 implantation in eutherian mammals, that eutherian implantation and the inflammatory marsupial

64 attachment reaction are homologous processes. That is, these processes evolved from an  
65 inflammatory fetal-maternal attachment reaction that likely existed in the therian ancestor.

66 The difference between the fetal-maternal attachment in marsupials and eutherians is its  
67 outcome. In the opossum the brief inflammatory attachment results in parturition, whereas in  
68 eutherians it results in implantation and establishment of a sustained fetal-maternal interface.

69 Here, we elucidate the mechanism by which the ancestral attachment-induced inflammatory  
70 response was transformed into the process of embryo implantation in the eutherian lineage. We  
71 show that the origin of decidual stromal cells (DSC) — a novel eutherian cell type — was  
72 integral to this transformation. First, we provide evidence to further support the homology  
73 between opossum attachment reaction and eutherian embryo implantation. Then, we compare  
74 gene expression in the uterus of opossum during attachment to that in two eutherians during  
75 implantation, armadillo and rabbit. The key differences in gene expression suggest that embryo  
76 implantation evolved through suppression of a specific module of the ancestral mucosal  
77 inflammatory reaction — neutrophil recruitment mediated by the pro-inflammatory cytokine  
78 IL17A. We hypothesized that the origin of DSC in the eutherian lineage (Mess and Carter 2006),  
79 coincidentally with embryo implantation, was responsible for the suppression of IL17A in  
80 members of this clade. A test of this hypothesis using human cells showed that secretions from  
81 DSC inhibit the differentiation of Th17 lymphocytes, the primary producers of IL17A, by  
82 inducing a non-standard type-1 interferon response that down-regulates their protein synthesis.

## 83 **Results and Discussion**

### 84 **Inflammatory implantation is an ancestral eutherian trait**

85 The inference of homology between the opossum attachment reaction and eutherian embryo  
86 implantation is derived from comparison of opossum to species from Boreotheria (Griffith,  
87 Chavan et al. 2017). Boreotheria is one of the three major clades that make up Eutheria and  
88 includes primates, rodents, ungulates, carnivores, bats and their kin. However, Eutheria also  
89 contains two other major clades, Xenarthra and Afrotheria (dos Reis, Inoue et al. 2012, Tarver,  
90 dos Reis et al. 2016), for which data on inflammatory gene expression at implantation was  
91 previously unavailable. Xenarthra includes armadillo, sloth, anteater, etc; and Afrotheria includes  
92 elephant, hyrax, tenrec, armadillo, dugong, etc. See **Figure 1d** for the phylogenetic relationship  
93 among eutherian species. To test the inference of homology, we investigated the hypothesis that  
94 inflammatory implantation is a shared eutherian character; that is, it is not limited to Boreotheria,  
95 but is also observed in Xenarthra and Afrotheria. We did this by assessing the expression of  
96 marker genes of inflammation during embryo implantation in the nine-banded armadillo  
97 (*Dasypus novemcinctus*) and rock hyrax (*Procapra capensis*), as representatives of Xenarthra and  
98 Afrotheria, respectively.

(a) Inflammation mediators during implantation

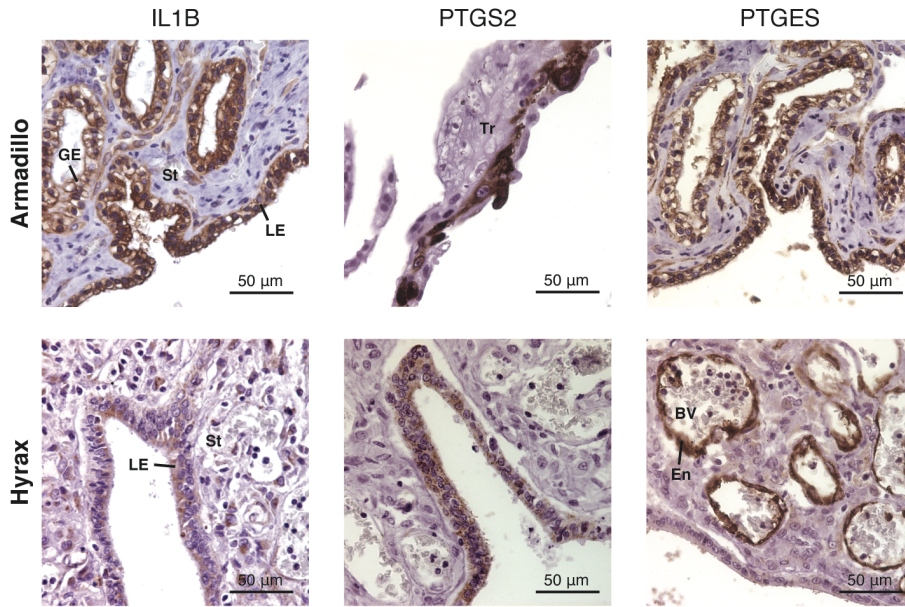

(b) Armadillo: cytokines (mRNA)

|        | Non pregnant | Peri implantation |
|--------|--------------|-------------------|
| IL1A   | 1.7          | 39.3              |
| IL1B   | 0            | 2.2               |
| TNF    | 0            | 0.5               |
| IL1R1  | 6.1          | 31.4              |
| IL6    | 2.3          | 6.4               |
| LIF    | 0            | 115.4             |
| PTGS2  | 2.4          | 14.6              |
| PTGES  | 1.2          | 100.2             |
| PTGER2 | 6.4          | 18.8              |
| PTGER4 | 18.4         | 18.4              |
| IL8    | 0.6          | 47.2              |
| IL10   | 0            | 15.4              |

tpm

90  
60  
30  
0

(c) Armadillo: genes upregulated at implantation

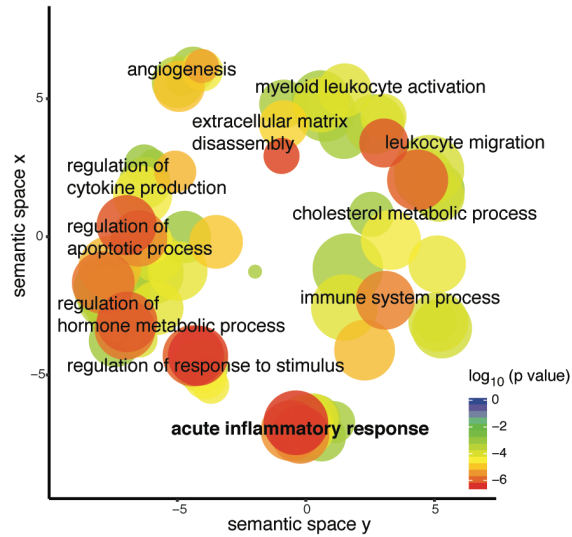

(d) Phylogenetic distribution of inflammation during implantation

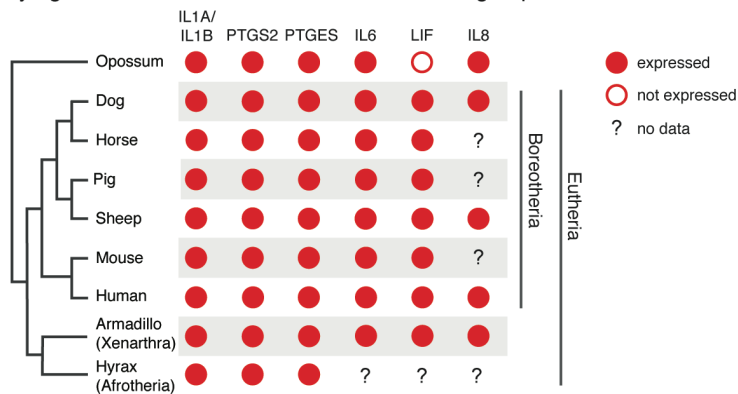

100 **Figure 1** Inflammatory implantation is an ancestral eutherian character. **(a)** Immunohistochemistry for  
101 inflammation marker genes *IL1B*, *PTGS2*, and *PTGES* at the fetal-maternal interface in armadillo and  
102 hyrax. Nuclei are blue due to hematoxylin counterstaining and the immunostaining signal is brown due to  
103 DAB (3,3'-diaminobenzidine). GE = glandular epithelium, LE = luminal epithelium, St = stroma, Tr =  
104 trophoblast, BV = blood vessel, En = endothelium. **(b)** Abundance of mRNA transcripts (TPM =  
105 Transcripts per Million) of key inflammatory genes in armadillo uterus in non-pregnant and peri-  
106 implantation stage. **(c)** Enriched gene ontology (GO) categories among the genes that are upregulated at  
107 least 10-fold in armadillo uterus in transition from non-pregnant to peri-implantation stage. GO categories  
108 are clustered by semantic similarity. GO categories closer to each other are semantically similar; those  
109 represented by red circles are more significantly enriched than those in blue. **(d)** Comparison of  
110 expression of inflammatory genes during embryo attachment or implantation in therian mammals. Data  
111 for human: cytokines (reviewed in Van Sinderen, Menkhorst et al. 2013), *PTGS2* (Marions and  
112 Danielsson 1999), *PTGES* (Milne, Perchick et al. 2001). Data for sheep, horse, pig, dog, and mouse:  
113 (reviewed in Chavan, Griffith et al. 2017).

114 One of the earliest signals of inflammation, *IL1B*, is expressed during implantation in the  
115 luminal epithelium of the endometrium in armadillo and hyrax (**Figure 1a**). *PTGS2* and *PTGES*,  
116 enzymes involved in the synthesis of prostaglandin E<sub>2</sub> (PGE<sub>2</sub>), are also expressed during  
117 implantation in both species, although the tissues in which these genes are expressed differ  
118 between species. *PTGS2* and *PTGES* are expressed on the two sides of the fetal-maternal  
119 interface in armadillo — *PTGS2* in the trophoblast, while *PTGES* in the endometrial luminal  
120 epithelium. In hyrax, they are both expressed on the maternal side, with *PTGS2* in the luminal  
121 epithelium and *PTGES* in the endothelia within the endometrium.

122 Next, we used transcriptome data to test whether there is a broad signature of inflammation  
123 during implantation in armadillo uterus. A variety of inflammatory genes are up-regulated during  
124 armadillo implantation: cytokines such as *IL1A*, *IL1B*, *IL6*, *LIF*, *IL8* (*CXCL8*), and *IL10*;  
125 cytokine receptor *IL1RI*; prostaglandin synthesis enzymes *PTGS2* and *PTGES*; and  
126 prostaglandin receptors *PTGER2* and *PTGER4* (**Figure 1b**). None of the cytokines shown in  
127 **Figure 1b** is expressed in the non-gravid uterus, i.e. their mRNA abundance is below the  
128 operational threshold of 3 TPM (Wagner, Kin et al. 2013), but most of them are expressed highly  
129 during implantation. Genes up-regulated more than 10-fold in the transition from non-pregnant  
130 to implantation stage are significantly enriched in Gene Ontology (GO) categories related to  
131 inflammation (**Figure 1c**), such as acute inflammatory process, immune system process,  
132 leukocyte migration, regulation of cytokine production, and regulation of response to stimulus.

133 We summarized the above expression pattern of inflammation marker genes during implantation  
134 on a phylogeny of therian mammals, along with the expression patterns from other representative  
135 eutherian species, and from a marsupial, opossum, at the time of attachment between fetal and  
136 maternal tissues at 13.5 days post-copulation (dpc) (**Figure 1d**). In all major clades of Eutheria,  
137 the uterine changes during embryo implantation closely resemble an acute inflammatory  
138 reaction. Parsimoniously, this suggests that embryo attachment-induced uterine inflammatory  
139 signaling is a plesiomorphic trait of eutherian mammals, i.e. a trait that was inherited from an

140 ancestral lineage and shared with the sister group, the marsupials, adding further support to the  
141 argument that attachment-induced inflammation of marsupials is homologous to eutherian  
142 embryo implantation (Griffith, Chavan et al. 2017, Griffith, Chavan et al. 2018, Liu 2018). In  
143 other words, eutherian implantation likely evolved from, and through modification of, ancestral  
144 attachment-induced inflammation.

### 145 **Differences in uterine gene expression between opossum and eutherians**

146 To understand *how* eutherian implantation evolved from the ancestral therian attachment induced  
147 inflammation, we compared uterine gene expression during attachment-induced inflammation in  
148 opossum (*Monodelphis domestica*) to that during implantation in two eutherian mammals,  
149 armadillo (*Dasypus novemcinctus*) and rabbit (*Oryctolagus cuniculus*) (rabbit data from Liu,  
150 Zhao et al. 2016). Gene expression patterns shared by armadillo and rabbit are likely to be shared  
151 by eutherians in general since armadillo and rabbit are phylogenetically positioned so that their  
152 common ancestor is the common ancestor of all extant eutherian mammals.

153 In the uterine transcriptomes of opossum, armadillo, and rabbit, we classified each gene as either  
154 expressed or not expressed (see Methods). We then classified these genes as “opossum-specific”  
155 if they are expressed in opossum but not expressed in armadillo and rabbit, and “Eutheria-  
156 specific” if they are not expressed in opossum but are expressed in both armadillo and rabbit.  
157 There are 446 and 456 genes in these categories, respectively, among the total of 11,089 genes  
158 that have one-to-one orthologs in all three species.

159 First we identified enriched GO categories in the opossum-specific and Eutheria-specific lists of  
160 genes (**Figure 2**). To increase the specificity of GO enrichment analysis, we used only the subset  
161 of the opossum-specific expressed genes that have an at least 2-fold higher gene expression in  
162 the attachment phase compared to the non-pregnant stage (204 genes). Such refinement of the  
163 Eutheria-specific gene set was not possible since we do not have a transcriptome of non-pregnant  
164 rabbit uterus. The opossum-specific set is enriched for genes related to lipid metabolism,  
165 especially mobilization of fatty acids from cell membrane, and lipid transport. Lipid metabolism  
166 genes are also upregulated in the pregnant uterus of another marsupial, fat-tailed dunnart  
167 (*Sminthopsis crassicaudata*) (Whittington, O’Meally et al. 2018). These genes may have  
168 functions related to nutrient transfer or steroid metabolism but lipid metabolism is also important  
169 in inflammation: for example, the first step in the synthesis of prostaglandins is to break down  
170 membrane triglycerides. The opossum-specific set is also enriched for GO category “cellular  
171 response to Interleukin-1”, i.e. genes downstream of IL1A and IL1B. This suggests that although  
172 inflammatory signaling is initiated by IL1A and/or IL1B upon embryo attachment in opossum as  
173 well as in eutherians, their downstream targets are activated only in the opossum. This  
174 observation recapitulates at the molecular level a phenomenon at the organismal level —  
175 inflammatory signaling is observed in both, but has different outcomes of parturition and  
176 implantation in opossum and eutherians respectively.

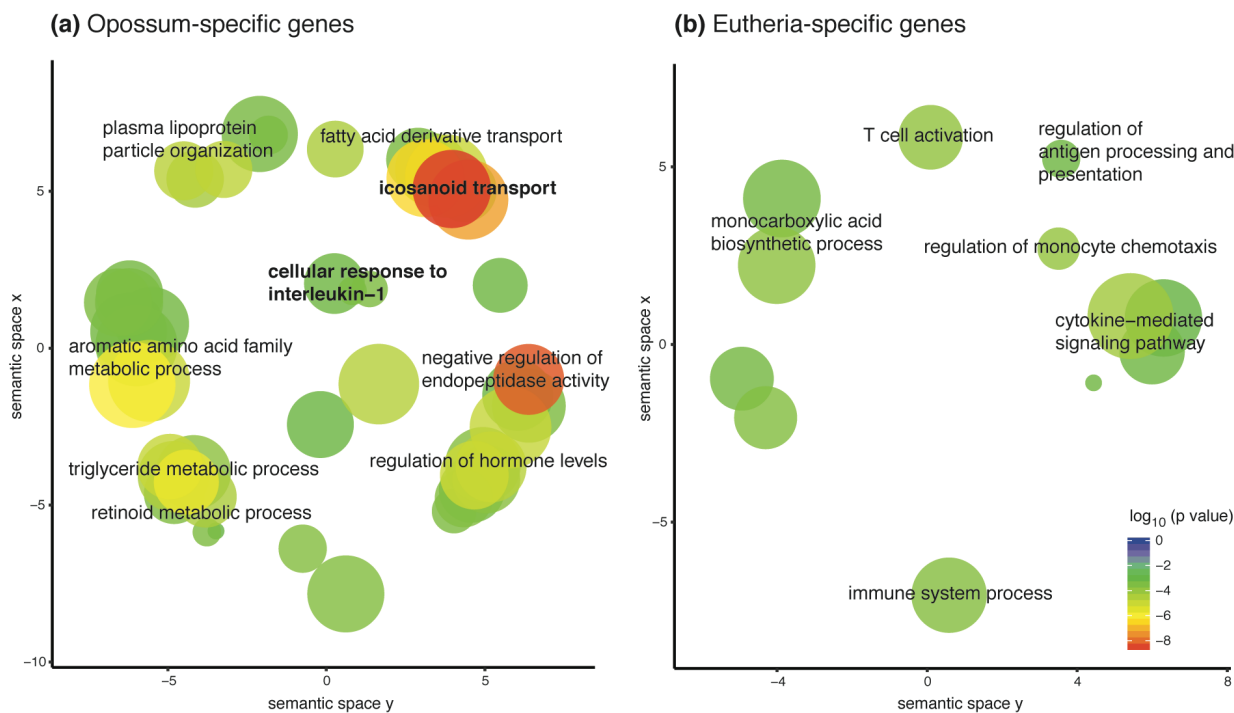

177

178 **Figure 2** Transcriptomic differences between marsupial and eutherian attachment reaction. Genes were  
179 classified as opossum-specific (a) and eutherian-specific (b). GO categories enriched in each set are  
180 shown in the figures, where semantically similar categories are clustered together in space.

### 181 **IL17A expression was suppressed in Eutheria**

182 IL1A and IL1B set off a cascade of inflammatory signaling events mediated by cytokine  
183 molecules. Therefore, in order to identify the specific differences between opossum and  
184 eutherians in response to interleukin-1, we looked for differences in the expression pattern of  
185 cytokines (**Figure 3a**). Cytokines were identified as genes assigned to GO category “cytokine  
186 activity” (GO:0005125).

187 Eutheria-specific expressed cytokines are *CXCL10*, *CCL5*, *NDP*, *WNT7A*, and *LIF*. The first two,  
188 *CXCL10* and *CCL5* attract leukocytes such as T cells, NK cells, and dendritic cells to the sites of  
189 inflammation (Schall 1991, Dufour, Dziejman et al. 2002). *NDP* and *WNT7A* are both members  
190 of the Wnt signaling pathway, which is important for communication between implanting  
191 blastocyst and endometrium (Wang and Dey 2006, Chen, Zhang et al. 2009, Sonderegger,  
192 Pollheimer et al. 2010); inhibition of this process prevents successful implantation in mouse  
193 (Mohamed, Jonnaert et al. 2005). *LIF* is a critical signaling molecule in eutherian mammals for  
194 the differentiation of decidual stromal cells from endometrial stromal fibroblasts; and its  
195 expression is therefore obligatory for successful implantation (Shuya, Menkhorst et al. 2011).  
196 This set of genes represents cytokines and signaling molecules that were likely recruited within  
197 the eutherian lineage to enable decidual cell differentiation, embryo-uterine crosstalk, regulation  
198 of leukocyte traffic, and therefore implantation.



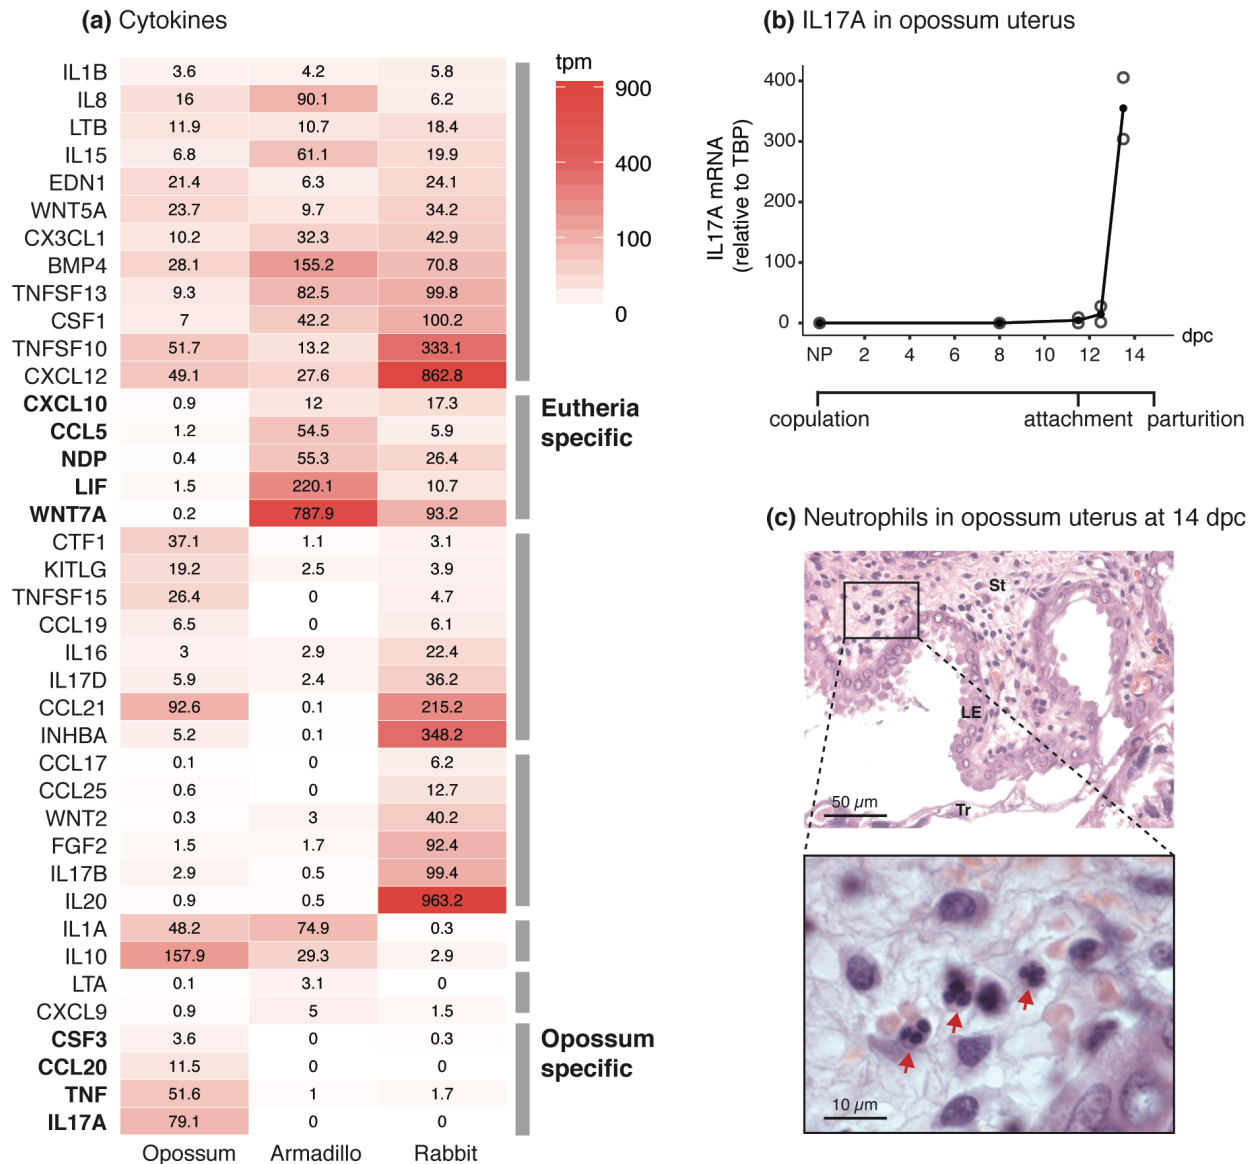

199

200 **Figure 3** IL17A signaling is suppressed in eutherians. **(a)** Gene expression of cytokines during embryo  
 201 attachment or implantation in opossum, armadillo, and rabbit uterus. Intensity of red is proportional to the  
 202 abundance of mRNA. Genes expressed below 3 TPM are considered unexpressed (Wagner, Kin et al.  
 203 2013). Rows are ordered by the gene expression patterns across species: expressed in all species,  
 204 expressed only in Eutheria, expressed in opossum and rabbit, rabbit-specific, expressed in opossum and  
 205 armadillo, armadillo-specific, and opossum-specific. Cytokines not expressed in any of these species are  
 206 not shown in the figure. **(b)** Expression of *IL17A* through the pregnancy of opossum, measured relative to  
 207 *TBP*, by qPCR. Embryo attachment begins around 11.5 days post-copulation (dpc), and pregnancy ends at  
 208 14.5 dpc. (number of biological replicates: NP = 3, 8 dpc = 3, 11.5 dpc = 2, 12.5 dpc = 2, 13.5 dpc = 2)  
 209 **(c)** Neutrophils infiltration in H&E stained opossum uterus at 14 dpc, indicated by red arrows in the  
 210 zoomed in micrograph. LE = luminal epithelium, St = stroma, Tr = trophoblast. TPM = Transcripts per  
 211 Million.

212 The inverse set, opossum-specific cytokines, includes *CSF3*, *CCL20*, *TNF*, and *IL17A*. *CSF3*,  
213 also known as G-CSF (Granulocyte Colony Stimulating Factor) attracts granulocytes (Lieschke,  
214 Grail et al. 1994, Panopoulos and Watowich 2008), such as neutrophils, and is positively  
215 regulated by *IL17A* (Ye, Rodriguez et al. 2001, Onishi and Gaffen 2010). *CCL20* attracts  
216 lymphocytes as well as neutrophils and also is a downstream gene of *IL17A* (Onishi and Gaffen  
217 2010). This pattern is indicative of a mucosal inflammatory reaction, culminating with  
218 recruitment of effector cells such as neutrophils.

219 Since *IL17A* is upstream of the other genes in the opossum-specific set, we then measured the  
220 expression of *IL17A* in opossum uterus by qPCR to test whether it is induced in response to the  
221 attaching embryo or expressed throughout pregnancy. **Figure 3b** shows that *IL17A* is not  
222 expressed in non-pregnant and 8 dpc uteri, and only begins expression at 11.5 dpc, coincidental  
223 with the egg-shell breakdown and beginning of fetal-maternal attachment. Its expression reaches  
224 a very high level by 13.5 dpc; 79 TPM according to the transcriptomic data. This time-course  
225 expression data suggests that *IL17A* is induced specifically in response to embryo attachment in  
226 opossum, even though it is completely absent in armadillo and rabbit during implantation (0  
227 TPM in both species). One of the hallmarks of *IL17A*-mediated inflammation — through the  
228 action of cytokines like *CXCL8*, *CSF3*, *CCL20* — is neutrophil infiltration into the inflamed  
229 tissue (Medzhitov 2007, Onishi and Gaffen 2010, Griffin, Newton et al. 2012, Pappu, Rutz et al.  
230 2012, Flannigan, Ngo et al. 2016). Therefore, we tested whether *IL17A* expression in opossum is  
231 also accompanied by neutrophil infiltration. Neutrophils are not seen in early stages of  
232 pregnancy, but at 14 dpc, neutrophil infiltration is clearly seen histologically (**Figure 3c**).  
233 Consistent with the pattern of *IL17A* expression, neutrophils are absent from the fetal-maternal  
234 interface at the time of implantation in eutherian mammals (evidence reviewed in Chavan,  
235 Griffith et al. 2017).

236 The absence of *IL17A* expression in eutherian mammals at implantation is likely to be due to its  
237 loss in the eutherian lineage rather than its recruitment in the marsupial lineage. The discovery of  
238 *IL17* homologs as the early-responding cytokines in the sea urchin larva during gut infection  
239 (Buckley, Ho et al. 2017) suggests that it may be an ancient mucosal inflammatory cytokine at  
240 least as old as deuterostomes. Since the endometrium is a mucosal tissue, *IL17A* — a key  
241 mucosal inflammatory cytokine — is likely to have been expressed in the ancestral therian  
242 endometrium during attachment-induced inflammation, and its expression was lost later during  
243 evolution in the eutherian lineage.

244 Because *IL17A* is 1) the most highly expressed gene among opossum-specific cytokines, 2) an  
245 important regulator of mucosal inflammation, 3) upstream of chemokines like *CSF3*, and 4) not  
246 expressed in armadillo and rabbit at all, even in a leaky manner, we posited that the loss of *IL17A*  
247 expression — and thus the loss of neutrophil infiltration — after embryo attachment was one of

248 the key innovations that transformed the ancestral inflammatory attachment reaction into embryo  
249 implantation.

250 Contrary to the data from armadillo and rabbit, some IL17A expression has been reported at the  
251 fetal-maternal interface in mouse and human, specifically in the  $\gamma\delta$  T cells in the mouse (Pinget,  
252 Corpuz et al. 2016). However, functional evidence suggests that even in mouse and human, an  
253 induction of IL17A expression at the fetal-maternal interface is detrimental to pregnancy. The  
254 strongest evidence perhaps comes from mouse, where injection of polyI:C to mimic viral  
255 infection during pregnancy induces the expression of IL17A in the decidua. Maternal IL17A then  
256 makes its way into the fetal circulation, interferes with brain development of the embryos, and  
257 leads to behavioral abnormalities resembling Autism Spectrum Disorder (ASD) in pups (Choi,  
258 Yim et al. 2016). Li and colleagues (Li, Qu et al. 2018) showed that in a mouse model of  
259 spontaneous abortion, Th17 cell numbers are higher in the decidua relative to normal pregnancy.  
260 In human, Th17 levels in peripheral blood are elevated in women with recurrent spontaneous  
261 abortions compared to women with healthy pregnancy (Wang, Hao et al. 2010). Nakashima and  
262 colleagues (Nakashima, Ito et al. 2010) found that while IL17A-positive cells were only  
263 occasionally present in the deciduae of normal pregnancies, their numbers were significantly  
264 elevated in pregnancies with first trimester spontaneous abortions. These studies clearly indicate  
265 that IL17A signaling at the fetal-maternal interface is not conducive to successful pregnancy, and  
266 the cases in human and mouse where IL17A expression is observed, the downstream signaling is  
267 likely inhibited in some way.

268 Next, we sought to identify the mechanism by which IL17A signaling was suppressed in the  
269 evolution of eutherian mammals.

### 270 **Decidual stromal cells suppressed IL17A expression at implantation in Eutheria**

271 Decidual stromal cells (DSC) are a novel cell type that originated in the stem lineage of eutherian  
272 mammals (Mess and Carter 2006, Wagner, Kin et al. 2014, Erkenbrack, Maziarz et al. 2018).  
273 They differentiate from endometrial stromal fibroblasts (ESF) in many eutherian mammals  
274 during pregnancy (Gellersen and Brosens 2014) and also during the menstrual cycle in primates,  
275 some bats, the elephant shrew (Emera, Romero et al. 2011), and the spiny mouse (Bellofiore,  
276 Ellery et al. 2017) in a process called decidualization. The evolution of DSC from ancestral  
277 therian ESF was associated with modulation of expression of genes involved in the innate  
278 immune response (Kin, Maziarz et al. 2016). DSC perform many functions critical to the  
279 maintenance of pregnancy in human and mouse, for example, regulation of the traffic of  
280 leukocytes into the endometrium during pregnancy (Nancy, Tagliani et al. 2012, Erlebacher  
281 2013), production of hormones like prolactin, regulation of invasiveness of the trophoblast  
282 (Gellersen and Brosens 2014), regulating communication between cell types at the fetal-maternal  
283 interface (Pavlicev, Wagner et al. 2017). Outside of euarchontoglires mammals (primates,  
284 rodents and their relatives), however, DSC are not maintained throughout the pregnancy. In bats

285 (Laurasiatheria), hyrax, tenrec (Afrotheria), and armadillo (Xenarthra, also see **Supp. Figure 1**),  
286 DSC differentiate around the time of implantation but are often lost soon after implantation. This  
287 suggests that the ancestral function of DSC when they originated, was likely to have been limited  
288 to the time of implantation (Chavan, Bhullar et al. 2016). Based on their inferred ancestral role at  
289 the time of implantation (Chavan, Bhullar et al. 2016), their ability to regulate the immune  
290 response during pregnancy (Erlebacher 2013), and because their origin in the eutherian stem  
291 lineage (Mess and Carter 2006) coincides with the evolution of suppression of IL17A expression  
292 (this study), we hypothesized that DSC played a role in the regulation of IL17A during  
293 implantation.

294 IL17A is typically expressed by Th17 cells, which differentiate from naïve T cells in the  
295 presence of IL6 and TGFB1 (Bettelli, Carrier et al. 2006) (**Figure 4a**). We hypothesized that  
296 DSC suppress IL17A expression by inhibiting the differentiation of naïve T cells into Th17 cells.  
297 To test this hypothesis, we differentiated primary human naïve T cells into Th17, in the presence  
298 of DSC-conditioned or control medium and measured IL17A secreted by T cells with ELISA.  
299 Treatment of differentiating T cells with DSC conditioned medium decreases their IL17A  
300 production significantly (2 fold,  $p < 10^{-6}$ ), while treatment with unconditioned DSC medium has  
301 no effect. The decreased level of IL17A is not statistically distinguishable from that in  
302 unstimulated naïve T cells, suggesting that DSC-conditioned medium completely suppresses  
303 upregulation of IL17A production during Th17 differentiation (**Figure 4b**; see **Supp. Figure 2**  
304 for mRNA levels of *IL17A*).

305 Wu and colleagues (Wu, Jin et al. 2014) showed that Th17 cells are present in the human  
306 endometrium during the first trimester and that they are recruited there by DSC, which appears to  
307 contradict what we have shown in this study. However, the Th17 cells reported in the decidua by  
308 Wu and colleagues are CD45RO+, i.e. they are memory Th17 cells that are already  
309 differentiated, while we show that DSC inhibit the differentiation of Th17 cells from naïve T  
310 cells.

**(a) Regulation of Type 17 response**

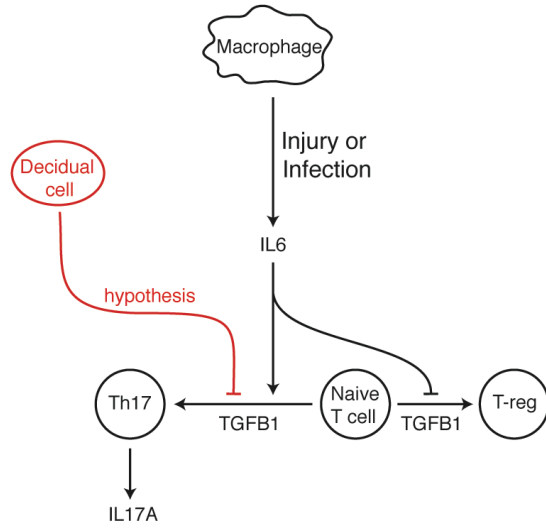

**(b) Test of hypothesis**

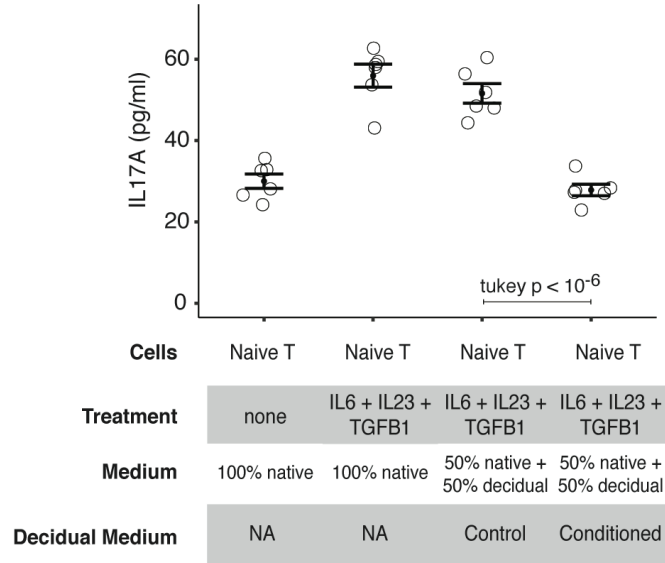

311

312 **Figure 4** Decidual stromal cells suppress Th17 cell differentiation. **(a)** Schematic showing how Th17  
 313 cells differentiate from naïve T cells, and the hypothesis for the role of DSC **(b)** Test of the hypothesis  
 314 using *in-vitro* differentiation of human naïve T cells into Th17 cells. IL17A secretion (pg/ml) by Th17  
 315 cells is shown (mean and standard error of the mean). The first two samples are reference points, where  
 316 Th17 cells were differentiated in their native medium, and the last two samples were differentiated in  
 317 DSC control or conditioned medium.

318 **DSC inhibit protein synthesis during Th17 differentiation**

319 To understand how DSC suppress differentiation of naïve T cells into Th17 cells, we sequenced  
 320 the transcriptomes of the differentiating T cells that were either treated with DSC conditioned  
 321 medium or control medium (conditions 3 and 4 from **Figure 4b**). Principal components analysis  
 322 of the transcriptome data shows that the DSC conditioned medium had a systematic effect on the  
 323 gene expression profile of the T cells since 60% of the variance between samples can be  
 324 explained by the first principal component along which the samples separate by treatment  
 325 (**Figure 5a**).

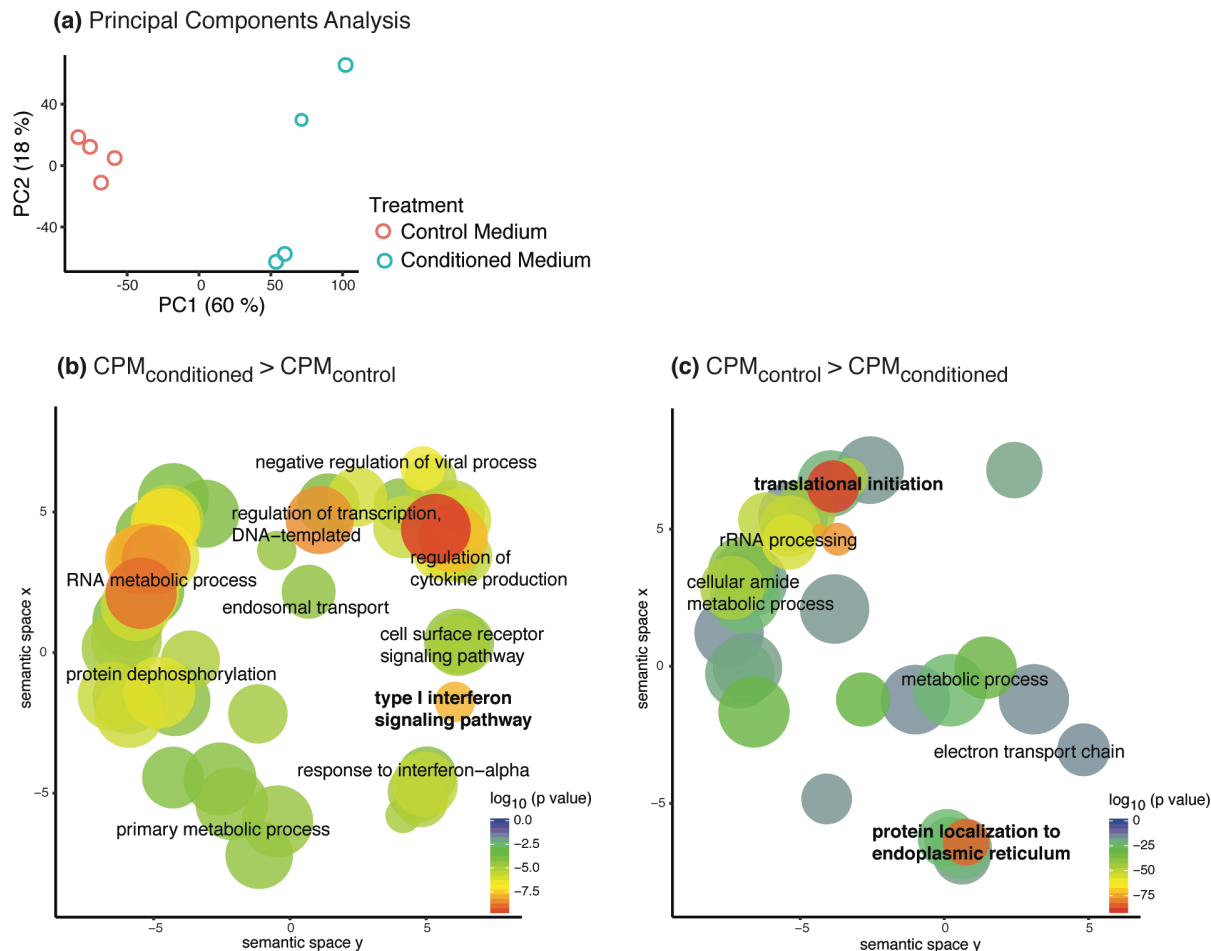

326

327 **Figure 5** RNA-seq of Th17 cells differentiated in control vs. DSC conditioned medium. **(a)** Principal  
328 components analysis of transcriptomes of the control and conditioned medium treated cells. Square root  
329 of CPM was used for this analysis. **(b)** and **(c)** respectively show GO categories enriched in genes that  
330 have higher expression in T cells treated with conditioned medium compared to the control medium, and  
331 vice versa. CPM = Counts per Million.

332 Genes significantly up-regulated, as assessed by EdgeR (Robinson, McCarthy et al. 2010), in T  
333 cells treated with DSC conditioned medium compared to T cells treated with control medium are  
334 enriched for GO categories related to defense of viral infection, such as the type-1 interferon  
335 signaling pathway, negative regulation of viral process, response to interferon alpha, RNA  
336 metabolic process (**Figure 5b**). The down-regulated genes are enriched for GO categories related  
337 to protein synthesis and secretion, e.g. rRNA processing, translation initiation, protein  
338 localization to endoplasmic reticulum. Genes of the electron transport chain are also down-  
339 regulated, suggesting that the cells down-regulated their ATP synthesis and became quiescent  
340 (**Figure 5c**).

341 Then we looked more specifically at genes in the type-1 interferon signaling pathway (**Figure**  
342 **6a**). Cells infected with virus produce type-1 interferons (IFN- $\alpha$  and IFN- $\beta$ ), which regulate gene  
343 expression in an autocrine and paracrine manner via binding to type-1 interferon receptors

344 IFNAR1 and IFNAR2. Curiously, none of the IFN- $\alpha$  genes is expressed in either samples, and  
345 IFN- $\beta$  gene (*IFNB*) is barely expressed in both samples (<1 TPM) but is not differentially  
346 expressed in response to DSC conditioned medium. Both IFN receptor genes, however, are  
347 significantly up-regulated in samples treated with conditioned medium (**Figure 6b**). Importantly,  
348 none of the type-1 interferons are expressed in DSC either (**Figure 6b**). This suggests that the  
349 activation of type-1 interferon signaling in T cells is in response to a specific non-interferon  
350 signal from DSC and not a genuine viral defense response.

351 One of the prominent outcomes of type-1 interferon signaling is inhibition of protein synthesis  
352 via mRNA degradation and inhibition of translation initiation machinery (Kindt, Goldsby et al.  
353 2007). This ensures that viral nucleic acids do not replicate within the host cells and produce  
354 more viral particles. In T cells treated with DSC-conditioned medium, three out of four 2'-5'  
355 oligoadenylate synthase genes (*OAS1*, *OAS2* and *OAS3*) genes are up-regulated (**Figure 6c**).  
356 These genes activate RNaseL, which in turn degrades mRNA. Most of the eukaryotic translation  
357 initiation factors (EIFs) are also down-regulated and at the same time two negative regulators of  
358 EIFs, viz. *EIF2AK2* and *EIF4EBP2* are up-regulated (**Figure 6d**), indicating decreased protein  
359 synthesis.

360 Together these observations suggest that DSC suppress Th17 differentiation by inducing type-1  
361 interferon signaling, which consequently decreases overall protein synthesis and ATP synthesis.  
362 However, DSC secrete neither type-1 IFNs nor do they induce the expression of type-1 IFNs in T  
363 cells, suggesting that DSC hijack the viral defense mechanism downstream of the IFN receptors  
364 to inhibit protein synthesis in T cells. This is in contrast to the bovine pregnancy in which the  
365 ruminant-specific type-1 interferon IFN- $\tau$  (*IFNT*) from the embryo suppresses *IL17A* expression  
366 in maternal peripheral blood mononuclear cells (Talukder, Rashid et al. 2018). Signals from DSC  
367 that inhibit protein synthesis in human T cells are unlikely to be generic molecules that can  
368 induce type-1 IFN signaling, e.g. cell free RNA or DNA. First of all, such molecules would  
369 induce type-1 IFN signaling in all cells at the fetal-maternal interface, which would be  
370 detrimental to the maintenance of pregnancy, just as a viral infection is (Yockey and Iwasaki  
371 2018, Yockey, Jurado et al. 2018). A generic signal would also suppress differentiation of naïve  
372 T cells into not only Th17 cells but also other effector T cells. However, T-reg cells are  
373 necessary for maintenance of pregnancy (Aluvihare, Kallikourdis et al. 2004), and their  
374 differentiation should not be hindered by DSC. Potential signals from DSC that may be acting on  
375 T cells are discussed in the supplementary material (**Supp. Figure 3**).

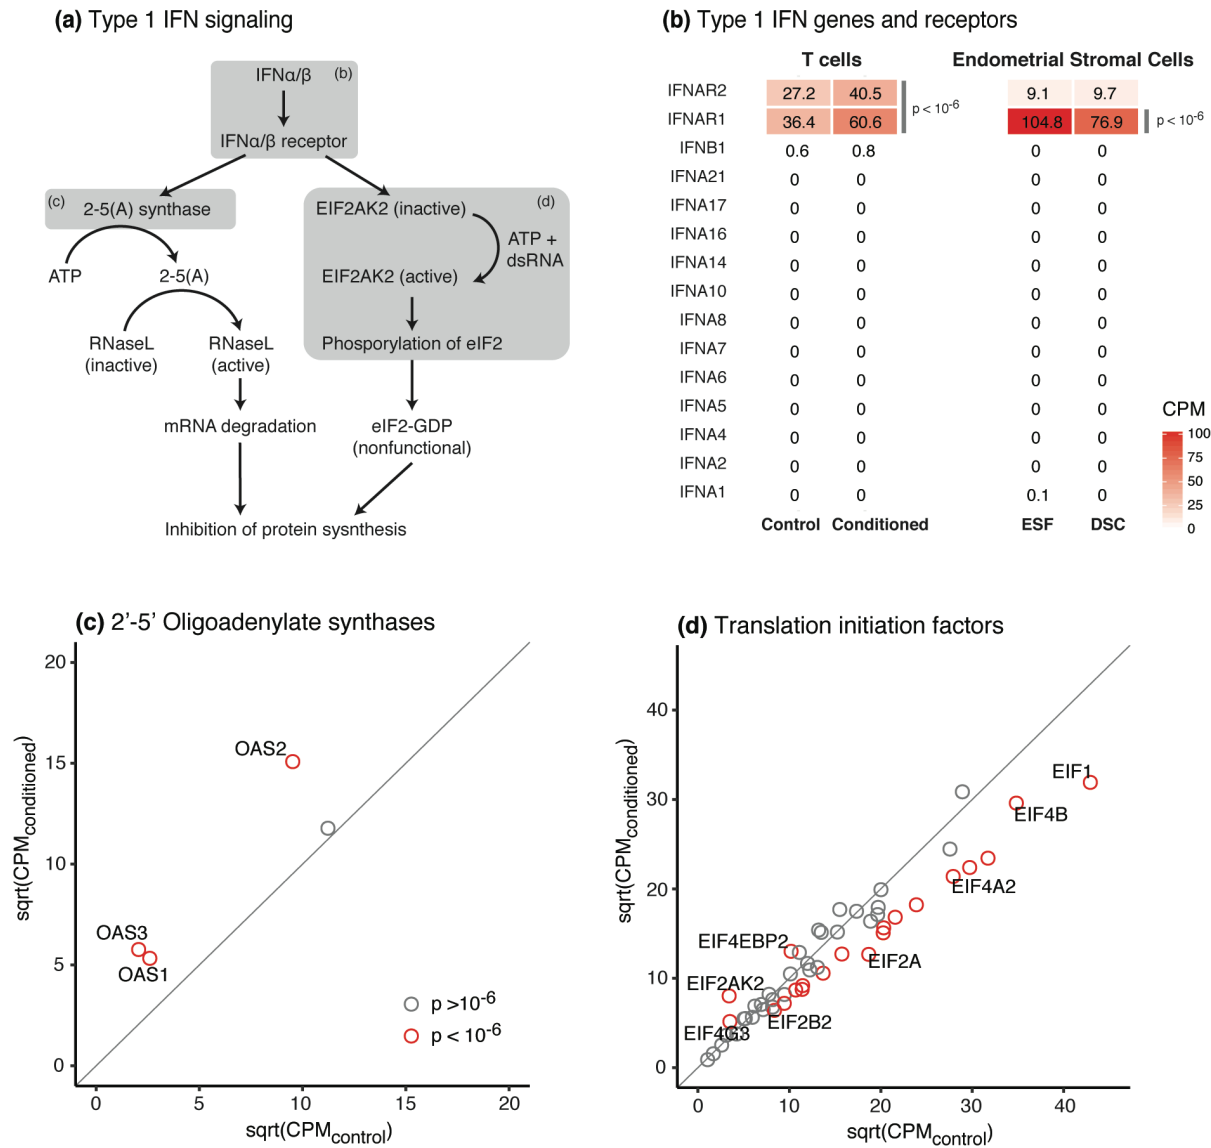

376

377 **Figure 6** Interferon signaling genes in T cells treated with DSC conditioned medium. **(a)** Schematic  
378 showing how type-1 interferon signaling pathway inhibits protein synthesis, adapted from (Kindt,  
379 Goldsby et al. 2007). Grey boxes show the sets of genes from this pathway whose gene expression is  
380 shown in the following panels of the figure. **(b)** Type-1 interferon genes and their receptors in Th17 cells  
381 differentiated with control or DSC conditioned medium, and in endometrial stromal cells. **(c)** 2'-5'  
382 Oligoadenylate synthase genes. **(d)** Eukaryotic translation initiation factors and some of their regulators.  
383 Red points in (c) and (d) represent genes significantly differentially expressed between control and DSC  
384 conditioned medium treated T cells according to EdgeR (see Methods). CPM = Counts per Million.



385 **A model for the evolution of implantation**

386 Placing the results from this study in the context of previous studies, the following model for the  
 387 evolution of embryo implantation emerges (**Figure 7**).

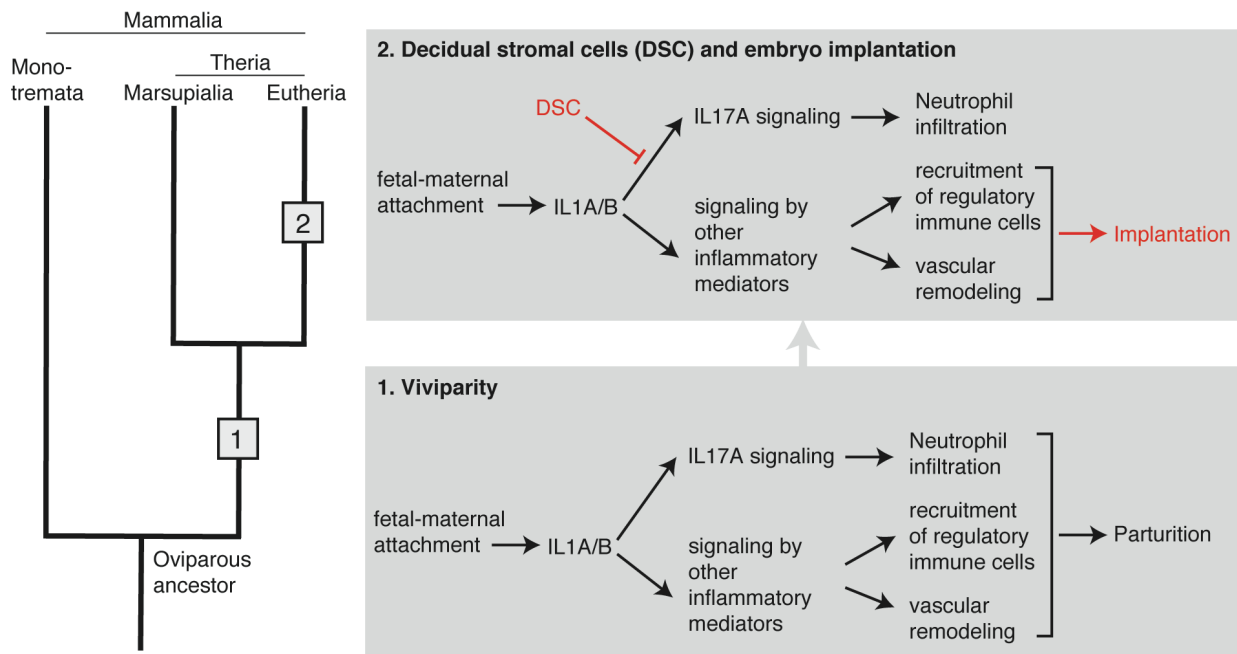

388  
 389 **Figure 7** Model for the evolution of eutherian implantation from attachment-induced inflammation.  
 390 Evolutionary events in the therian and eutherian stem lineages are represented by numbers 1 and 2  
 391 respectively.

392 The ancestor of all mammals was an egg-laying amniote. Mammalian viviparity originated in the  
 393 stem lineage of therian mammals by early “hatching” of the embryo while it was still within the  
 394 uterus/shell gland, leading to a direct physical contact between fetal membranes and the uterine  
 395 endometrial lining. This novel tissue interaction, and potentially an irritation of the endometrial  
 396 lining from fetal proteases that help dissolve the shell (Griffith, Chavan et al. 2017), induced an  
 397 acute inflammatory response in the endometrium. An inflamed uterus, unable to maintain and  
 398 nourish a live embryo within it, expelled the embryo, i.e. parturition ensued as a consequence of  
 399 attachment-induced inflammation.

400 Hence we assume that the ancestral condition for therians was a typical mucosal inflammation in  
 401 response to embryo attachment. However, in the stem lineage of eutherian mammals, this  
 402 inflammatory response became evolutionarily modified such that the endometrium could  
 403 maintain and nourish the embryo, even though it initiated an inflammation-like response. One of  
 404 these modifications was the suppression of IL17A signaling, which resulted in the prevention of  
 405 recruitment of neutrophils to the endometrium during implantation. This may have been a crucial  
 406 modification to the inflammatory response since neutrophils are known to cause collateral tissue  
 407 damage from the digestive enzymes they secrete; and the attaching embryo also would likely  
 408 have not been spared from this tissue damage. Turning off IL17A early in the evolution of the

409 eutherian lineage may have allowed the endometrium to maintain the embryo for a prolonged  
410 period. In contrast, many other aspects of the ancestral inflammation may have been beneficial to  
411 the maintenance and nourishment of the embryo, e.g. increased vascular permeability and  
412 angiogenesis may have helped nutrient transfer, therefore still maintained as a necessary part of  
413 implantation. The ancestral attachment-induced inflammation induced a stress reaction in the  
414 endometrial stromal fibroblasts (ESF), causing the death of most of these cells. In the eutherian  
415 lineage, however, ESF evaded the stress-induced cell death (Kajihara, Jones et al. 2006, Leitao,  
416 Jones et al. 2010, Muter and Brosens 2018) by evolving mechanisms to differentiate into a novel  
417 cell type, decidual stromal cells (DSC) (Erkenbrack, Maziarz et al. 2018). It is this novel cell  
418 type that likely brought about the suppression of IL17A by inhibiting the differentiation of  
419 IL17A-producing cells at the fetal-maternal interface, and thus enabled the evolution of embryo  
420 implantation and a sustainable fetal-maternal interface.

## 421 **Methods**

### 422 **Animals and tissue samples**

423 Nine-banded armadillos (*Dasypus novemcinctus*) were collected in Centerville, TX, USA, in  
424 accordance with Yale University IACUC protocol #2014-10906. Two females were used in this  
425 study — one non-pregnant and one at the peri-implantation stage of pregnancy where the fetal  
426 membranes have begun invading the endometrium but no placental villi are yet formed. Rock  
427 hyrax (*Procapra capensis*) samples were collected at Bar-Ilan University, Israel. One out of three  
428 females collected was in the implantation phase of pregnancy as determined by histological  
429 examination. The blastocyst was attached to the uterine lumen but had not started invading the  
430 endometrium. Opossum (*Monodelphis domestica*) tissues were collected from the colony housed  
431 at Yale University. Samples were fixed in 4% paraformaldehyde in phosphate-buffered saline  
432 (PBS) for histology and immunohistochemistry, saved in RNAlater (Ambion) for RNA  
433 extraction. For more information about armadillo samples, see (Chavan and Wagner 2016), and  
434 about opossum samples see (Griffith, Chavan et al. 2017). A list of animals used in this study is  
435 given in **Supp. Table 1**.

### 436 **Immunohistochemistry**

437 Formaldehyde-fixed tissues were dehydrated in ethanol, cleared in toluene, and embedded in  
438 paraffin. Sections of 5µm thickness were made on a microtome and placed on poly-L-lysine  
439 coated glass slides. Immunohistochemistry was performed by following the protocol in (Chavan  
440 and Wagner 2016). Briefly, slides were incubated at 60 °C for 30 min and allowed to cool at  
441 room temperature for 5 min. Paraffin was removed by de-waxing the slides in xylene. Slides  
442 were then rehydrated by successive washes in 100% ethanol, followed by running tap water.  
443 Sodium Citrate buffer (pH 6.0) was used for heat mediated antigen retrieval. After washing the  
444 slides in PBS, they were blocked in a 0.1% solution of Bovine Serum Albumin (BSA) in PBS.

445 Endogenous peroxidases were suppressed with Peroxidase Block (DAKO). Optimized dilutions  
446 of primary antibodies (see **Supp. Table 2**) were added to the slides and were incubated overnight  
447 at 4°C in a humidification chamber. Secondary antibody was added after washing the primary  
448 antibody off with PBS and 0.1% BSA-PBS, and incubated for 1 hour at room temperature, and  
449 washed off with PBS and 0.1% BSA-PBS. Horseradish peroxidase (HRP) tagged secondary  
450 antibodies were detected by either 3,3'-diaminobenzidine (DAB) and counterstained with  
451 hematoxylin.

## 452 **Cell culture experiments**

### 453 *DSC and DSC conditioned medium*

454 Immortalized human endometrial stromal fibroblasts (hESF) from ATCC (ATCC; cat. no. CRL-  
455 4003) were cultured in growth medium with the following contents per liter: 15.56 g DMEM  
456 (D2906, Sigma-Aldrich), 1.2 g sodium bicarbonate, 10 ml sodium pyruvate (11360, Thermo  
457 Fisher), 10 ml ABAM (15240062, Gibco), 1 ml ITS (354350, VWR), and 100 ml charcoal-  
458 stripped FBS. ESF were differentiated into decidual stromal cells (DSC) in differentiation  
459 medium with the following contents per liter: 15.56g DMEM (D8900, Sigma-Aldrich), 1.2g  
460 sodium bicarbonate, 10 ml ABAM, 0.5 mM cAMP analog 8-Bromoadenosine 3',5'-cyclic  
461 monophosphate sodium salt (B7880, Sigma-Aldrich), 1 µM progesterone analog  
462 Medroxyprogesterone 17-acetate (MPA; M1629, Sigma-Aldrich), and 20 ml FBS.

463 Cells were differentiated for 48 hours at 37 °C, conditioned medium was collected from at least 6  
464 replicate flasks, filtered through sterile 0.45 µm filter to remove cell debris, aliquoted, and frozen  
465 at -80 °C until used. For control samples, decidualization medium was incubated for 48 hours at  
466 37 °C without any cells in at least 6 replicate flasks, processed in the same way as conditioned  
467 medium, and frozen at -80 °C.

### 468 *T cells*

469 Human Peripheral Blood Mononuclear Cells (PBMC) were isolated from whole blood (70501,  
470 StemCell Technologies) using Lymphoprep (07851, StemCell Technologies) and 50 ml SepMate  
471 tubes (85450, StemCell Technologies). These PBMCs were used to isolate CD4+ CD45RO-  
472 naïve T cells with EasySep Human Naïve CD4+ T Cell Isolation Kit (19555, StemCell  
473 Technologies). Naïve T cells were resuspended at 10<sup>6</sup> cells/ml in ImmunoCult-XF T Cell  
474 Expansion medium (10981, StemCell Technologies) in the presence of ImmunoCult  
475 CD3/CD28/CD2 T Cell Activator (10970, StemCell Technologies) for culture or Th17  
476 differentiation. For Th17 differentiation the following were added to the above cell suspension:  
477 20 ng/ml IL6 (78050, StemCell Technologies), 5 ng/ml TGFB1 (78067, StemCell Technologies),  
478 and 50 ng/ml IL23 (14-8239-63, eBioScience). If conditioned medium was used, the above  
479 suspension was made in 1:1 solution of conditioned or control medium and the T cell expansion  
480 medium. Cell suspension was then transferred to 24-well plates, with 10<sup>6</sup> cells per well. Samples  
481 with different treatments were placed in a Latin square design on 24-well plates to prevent

482 systematic effects arising from the positions of the samples in the plate. Cells were incubated at  
483 37 °C for 7 days for differentiation. Cells, which are in suspension, were spun down to collect the  
484 supernatant and cell pellet. RNA was extracted from the cell pellets for RNA-seq (see below),  
485 and secreted IL17A was measured in the supernatants with Quantikine ELISA kit for human  
486 IL17A (D1700, R&D Systems).

#### 487 **RNA-seq data**

488 Among the animal tissue collected for this study, armadillo samples were used for RNA-  
489 sequencing. RNA was extracted from whole uteri. Sequencing library for RNA from non-  
490 pregnant armadillo was prepared and sequenced at the Yale Center for Genome Analysis.  
491 Library preparation and sequencing of the RNA from implantation stage armadillo was  
492 performed at Cincinnati Children's Hospital Medical Center.

493 RNA from CD4+ naïve T cells differentiated into Th17 cells in the presence of DSC conditioned  
494 medium was extracted using Qiagen RNeasy Micro Kit (74004, Qiagen). Libraries were  
495 prepared and sequenced at the Yale Center for Genome Analysis.

496 Data for rabbit uterus (*Oryctolagus cuniculus*), grey short-tailed opossum (*Monodelphis*  
497 *domestica*) and human endometrial stromal cells were downloaded from Gene Expression  
498 Omnibus (GEO) (Barrett, Wilhite et al. 2013). GEO Accession numbers of the downloaded  
499 datasets as well as those generated in this study are listed in **Supp. Table 3**.

#### 500 **RNA-seq analysis**

501 RNA-seq data were aligned to the following Ensembl genomes using TopHat2 (Kim, Pertea et  
502 al. 2013): GRCh37 for human, DasNov3 for armadillo, OryCun2 for rabbit, and MonDom5 for  
503 opossum. Number of reads mapping to genes were counted with HTSeq (Anders, Pyl et al.  
504 2015). Read counts were normalized to Transcripts per Million (TPM) (Wagner, Kin et al. 2012),  
505 and 3 TPM was used as an operational threshold to call genes as expressed or unexpressed  
506 (Wagner, Kin et al. 2013). Median length of all transcripts of a gene was used as its 'feature  
507 length' for TPM normalization. Differential gene expression analysis for human T cell and  
508 endometrial stromal cell data was performed on protein coding genes with the R package EdgeR  
509 (Robinson, McCarthy et al. 2010). For these samples, read counts are normalized by EdgeR to  
510 Counts per Million (CPM), and are presented as such.

511 In analyses involving multiple species, only those genes were included that have one-to-one  
512 orthology among the species compared. Orthology data from Ensembl Compara database  
513 (Herrero, Muffato et al. 2016) were used. In these analyses, read counts were re-normalized to  
514 TPM using only the set of orthologous genes in order to make TPM values comparable between  
515 species.

516 Enriched gene ontology (GO) categories in sets of genes were identified with the online tool  
517 GOrilla (Eden, Navon et al. 2009). Lists of enriched GO categories were visualized on REVIGO

518 (Supek, Bošnjak et al. 2011), which clusters semantically similar GO terms in space, simplifying  
519 interpretation of long lists of redundant GO categories.

## 520 **qPCR**

521 Expression of IL17A through opossum pregnancy was measured using qPCR at a finer time  
522 scale than the transcriptomic data. RNA from non-pregnant, 8 dpc, 11.5 dpc, 12.5 dpc, and 13.5  
523 dpc uteri was extracted and reverse transcribed to cDNA using High Capacity Reverse  
524 Transcriptase Kit (4368814, Thermo Fisher). Abundance of IL17A mRNA was measured  
525 relative to TBP (Tata Binding Protein) mRNA with a standard curve approach using Power  
526 SYBR Green PCR Master Mix (4367659, Applied Biosystems) on StepOne Plus Real Time PCR  
527 System (Applied Biosystems). Primer sequences are in **Supp. Table 4**.

## 528 **Acknowledgements**

529 This research was supported by John Templeton Foundation Grant #54860 to GPW. We would  
530 like to thank Haleigh Larson for assistance with histology.

## 531 **Competing Interests**

532 No competing interests to declare.

## 533 **References**

- 534 Aluvihare, V. R., M. Kallikourdis and A. G. Betz (2004). "Regulatory T cells mediate maternal  
535 tolerance to the fetus." *Nat Immunol* **5**(3): 266-271.
- 536 Anders, S., P. T. Pyl and W. Huber (2015). "HTSeq—a Python framework to work with high-  
537 throughput sequencing data." *Bioinformatics* **31**(2): 166-169.
- 538 Ashary, N., A. Tiwari and D. Modi (2018). "Embryo Implantation: War in Times of Love."  
539 *Endocrinology* **159**(2): 1188-1198.
- 540 Barash, A., N. Dekel, S. Fieldust, I. Segal, E. Schechtman and I. Granot (2003). "Local injury to  
541 the endometrium doubles the incidence of successful pregnancies in patients undergoing in vitro  
542 fertilization." *Fertility and Sterility* **79**(6): 1317-1322.
- 543 Barrett, T., S. E. Wilhite, P. Ledoux, C. Evangelista, I. F. Kim, M. Tomashevsky, K. A.  
544 Marshall, K. H. Phillippy, P. M. Sherman, M. Holko, A. Yefanov, H. Lee, N. Zhang, C. L.  
545 Robertson, N. Serova, S. Davis and A. Soboleva (2013). "NCBI GEO: archive for functional  
546 genomics data sets—update." *Nucleic Acids Research* **41**(Database issue): D991-D995.
- 547 Bellofiore, N., S. J. Ellery, J. Mamrot, D. W. Walker, P. Temple-Smith and H. Dickinson (2017).  
548 "First evidence of a menstruating rodent: the spiny mouse (*Acomys cahirinus*)." *American*  
549 *Journal of Obstetrics and Gynecology* **216**(1): 40.e41-40.e11.

- 550 Bettelli, E., Y. Carrier, W. Gao, T. Korn, T. B. Strom, M. Oukka, H. L. Weiner and V. K.  
551 Kuchroo (2006). "Reciprocal developmental pathways for the generation of pathogenic effector  
552 TH17 and regulatory T cells." Nature **441**: 235.
- 553 Buckley, K. M., E. C. H. Ho, T. Hibino, C. S. Schrankel, N. W. Schuh, G. Wang and J. P. Rast  
554 (2017). "IL17 factors are early regulators in the gut epithelium during inflammatory response to  
555 *Vibrio* in the sea urchin larva." eLife **6**: e23481.
- 556 Chavan, A. R., B.-A. S. Bhullar and G. P. Wagner (2016). "What was the ancestral function of  
557 decidual stromal cells? A model for the evolution of eutherian pregnancy." Placenta **40**: 40-51.
- 558 Chavan, A. R., O. W. Griffith and G. P. Wagner (2017). "The inflammation paradox in the  
559 evolution of mammalian pregnancy: turning a foe into a friend." Curr Opin Genet Dev **47**: 24-32.
- 560 Chavan, A. R. and G. P. Wagner (2016). "The fetal-maternal interface of the nine-banded  
561 armadillo: endothelial cells of maternal sinus are partially replaced by trophoblast." Zoological  
562 Letters **2**(1): 11.
- 563 Chen, Q., Y. Zhang, J. Lu, Q. Wang, S. Wang, Y. Cao, H. Wang and E. Duan (2009). "Embryo-  
564 uterine cross-talk during implantation: the role of Wnt signaling†." MHR: Basic science of  
565 reproductive medicine **15**(4): 215-221.
- 566 Choi, G. B., Y. S. Yim, H. Wong, S. Kim, H. Kim, S. V. Kim, C. A. Hoeffler, D. R. Littman and  
567 J. R. Huh (2016). "The maternal interleukin-17a pathway in mice promotes autism-like  
568 phenotypes in offspring." Science **351**(6276): 933.
- 569 Dekel, N., Y. Gnainsky, I. Granot, K. Racicot and G. Mor (2014). "The Role of Inflammation for  
570 a Successful Implantation." American Journal of Reproductive Immunology **72**(2): 141-147.
- 571 dos Reis, M., J. Inoue, M. Hasegawa, R. J. Asher, P. C. Donoghue and Z. Yang (2012).  
572 "Phylogenomic datasets provide both precision and accuracy in estimating the timescale of  
573 placental mammal phylogeny." Proc Biol Sci **279**(1742): 3491-3500.
- 574 Dufour, J. H., M. Dziejman, M. T. Liu, J. H. Leung, T. E. Lane and A. D. Luster (2002). "IFN- $\gamma$ -  
575 Inducible Protein 10 (IP-10; CXCL10)-Deficient Mice Reveal a Role for IP-10 in Effector T Cell  
576 Generation and Trafficking." The Journal of Immunology **168**(7): 3195.
- 577 Eden, E., R. Navon, I. Steinfeld, D. Lipson and Z. Yakhini (2009). "GORilla: a tool for discovery  
578 and visualization of enriched GO terms in ranked gene lists." BMC Bioinformatics **10**(1): 48.
- 579 Emera, D., R. Romero and G. Wagner (2011). "The evolution of menstruation: A new model for  
580 genetic assimilation." BioEssays **34**(1): 26-35.
- 581 Enders, A. C. and S. Schlafke (1969). "Cytological aspects of trophoblast-uterine interaction in  
582 early implantation." Am J Anat **125**(1): 1-29.

- 583 Erkenbrack, E. M., J. D. Maziarz, O. W. Griffith, C. Liang, A. R. Chavan, M. C. Nnamani and  
584 G. P. Wagner (2018). "The mammalian decidual cell evolved from a cellular stress response."  
585 PLOS Biology **16**(8): e2005594.
- 586 Erlebacher, A. (2013). "Immunology of the maternal-fetal interface." Annu. Rev. Immunol. **31**:  
587 387-411.
- 588 Finn, C. A. (1986). "Implantation, menstruation and inflammation." Biological Reviews **61**(4):  
589 313-328.
- 590 Flannigan, K. L., V. L. Ngo, D. Geem, A. Harusato, S. A. Hirota, C. A. Parkos, N. W. Lukacs,  
591 A. Nusrat, V. Gaboriau-Routhiau, N. Cerf-Bensussan, A. T. Gewirtz and T. L. Denning (2016).  
592 "IL-17A-mediated neutrophil recruitment limits expansion of segmented filamentous bacteria."  
593 Mucosal Immunology **10**: 673.
- 594 Gellersen, B. and J. J. Brosens (2014). "Cyclic decidualization of the human endometrium in  
595 reproductive health and failure." Endocr Rev **35**(6): 851-905.
- 596 Griffin, G. K., G. Newton, M. L. Tarrío, D.-x. Bu, E. Maganto-Garcia, V. Azcutia, P. Alcaide, N.  
597 Gräbie, F. W. Lusciński, K. J. Croce and A. H. Lichtman (2012). "IL-17 and TNF- $\alpha$  Sustain  
598 Neutrophil Recruitment during Inflammation through Synergistic Effects on Endothelial  
599 Activation." The Journal of Immunology **188**(12): 6287.
- 600 Griffith, O. W., A. R. Chavan, S. Protopapas, J. Maziarz, R. Romero and G. P. Wagner (2017).  
601 "Embryo implantation evolved from an ancestral inflammatory attachment reaction."  
602 Proceedings of the National Academy of Sciences doi: **10.1073/pnas.1701129114**.
- 603 Griffith, O. W., A. R. Chavan, S. Protopapas, J. Maziarz, R. Romero and G. P. Wagner (2018).  
604 "Reply to Liu: Inflammation before implantation both in evolution and development." Proc Natl  
605 Acad Sci U S A **115**(1): E3-E4.
- 606 Hansen, V. L., L. S. Faber, A. A. Salehpoor and R. D. Miller (2017). "A pronounced uterine pro-  
607 inflammatory response at parturition is an ancient feature in mammals." Proceedings of the  
608 Royal Society B: Biological Sciences **284**(1865).
- 609 Herrero, J., M. Muffato, K. Beal, S. Fitzgerald, L. Gordon, M. Pignatelli, A. J. Vilella, S. M. J.  
610 Searle, R. Amode, S. Brent, W. Spooner, E. Kulesha, A. Yates and P. Flicek (2016). "Ensembl  
611 comparative genomics resources." Database **2016**: bav096-bav096.
- 612 Kajihara, T., M. Jones, L. Fusi, M. Takano, F. Feroze-Zaidi, G. Pirianov, H. Mehmet, O.  
613 Ishihara, J. M. Higham, E. W. Lam and J. J. Brosens (2006). "Differential expression of FOXO1  
614 and FOXO3a confers resistance to oxidative cell death upon endometrial decidualization." Mol  
615 Endocrinol **20**(10): 2444-2455.
- 616 Keys, J. L., G. J. King and T. G. Kennedy (1986). "Increased uterine vascular permeability at the  
617 time of embryonic attachment in the pig." Biology of Reproduction **34**(2): 405-411.

- 618 Kim, D., G. Pertea, C. Trapnell, H. Pimentel, R. Kelley and S. L. Salzberg (2013). "TopHat2:  
619 accurate alignment of transcriptomes in the presence of insertions, deletions and gene fusions."  
620 Genome Biology **14**(4): R36.
- 621 Kin, K., J. Maziarz, A. R. Chavan, M. Kamat, S. Vasudevan, A. Birt, D. Emera, V. J. Lynch, T.  
622 L. Ott, M. Pavlicev and G. P. Wagner (2016). "The Transcriptomic Evolution of Mammalian  
623 Pregnancy: Gene Expression Innovations in Endometrial Stromal Fibroblasts." Genome Biol  
624 Evol **8**(8): 2459-2473.
- 625 Kindt, T. J., R. A. Goldsby and B. A. Osborne (2007). Kuby immunology. New York, W.H.  
626 Freeman and Company.
- 627 Leitao, B., M. C. Jones, L. Fusi, J. Higham, Y. Lee, M. Takano, T. Goto, M. Christian, E. W. F.  
628 Lam and J. J. Brosens (2010). "Silencing of the JNK pathway maintains progesterone receptor  
629 activity in decidualizing human endometrial stromal cells exposed to oxidative stress signals."  
630 Faseb j **24**(5): 1541-1551.
- 631 Li, N., Q. Qu and Q. Yan (2018). "The role of Th17/Treg-mediated immunoregulation in  
632 abortion mice." European Journal of Inflammation **16**: 2058739218760354.
- 633 Lieschke, G. J., D. Grail, G. Hodgson, D. Metcalf, E. Stanley, C. Cheers, K. J. Fowler, S. Basu,  
634 Y. F. Zhan and A. R. Dunn (1994). "Mice lacking granulocyte colony-stimulating factor have  
635 chronic neutropenia, granulocyte and macrophage progenitor cell deficiency, and impaired  
636 neutrophil mobilization." Blood **84**(6): 1737.
- 637 Liu, J.-L. (2018). "Implantation in eutherians: Which came first, the inflammatory reaction or  
638 attachment?" Proceedings of the National Academy of Sciences **115**(1): E1.
- 639 Liu, J.-L., M. Zhao, Y. Peng and Y.-S. Fu (2016). "Identification of gene expression changes in  
640 rabbit uterus during embryo implantation." Genomics **107**(5): 216-221.
- 641 Marions, L. and K. G. Danielsson (1999). "Expression of cyclo-oxygenase in human  
642 endometrium during the implantation period." Mol Hum Reprod **5**(10): 961-965.
- 643 McAllan, B. M. (2011). Chapter 10 - Reproductive Endocrinology of Prototherians and  
644 Metatherians. Hormones and Reproduction of Vertebrates. D. O. N. H. Lopez. London,  
645 Academic Press: 195-214.
- 646 Medzhitov, R. (2007). "Recognition of microorganisms and activation of the immune response."  
647 Nature **449**: 819.
- 648 Mess, A. and A. M. Carter (2006). "Evolutionary transformations of fetal membrane characters  
649 in Eutheria with special reference to Afrotheria." J Exp Zool B Mol Dev Evol **306**(2): 140-163.
- 650 Milne, S. A., G. B. Perchick, S. C. Boddy and H. N. Jabbour (2001). "Expression, localization,  
651 and signaling of PGE(2) and EP2/EP4 receptors in human nonpregnant endometrium across the  
652 menstrual cycle." J Clin Endocrinol Metab **86**(9): 4453-4459.



- 653 Mohamed, O. A., M. Jonnaert, C. Labelle-Dumais, K. Kuroda, H. J. Clarke and D. Dufort  
654 (2005). "Uterine Wnt/ $\beta$ -catenin signaling is required for implantation." Proceedings of the  
655 National Academy of Sciences of the United States of America **102**(24): 8579.
- 656 Mor, G., I. Cardenas, V. Abrahams and S. Guller (2011). "Inflammation and pregnancy: the role  
657 of the immune system at the implantation site." Annals of the New York Academy of Sciences  
658 **1221**(1): 80-87.
- 659 Mossman, H. W. (1937). "Comparative morphogenesis of the fetal membranes and accessory  
660 uterine structures." Contributions to Embryology **26**(158): 133-137.
- 661 Muter, J. and J. J. Brosens (2018). Decidua. Encyclopedia of Reproduction (Second Edition). M.  
662 K. Skinner. Oxford, Academic Press: 424-430.
- 663 Nakashima, A., M. Ito, T. Shima, D. Bac Nguyen, T. Hidaka and S. Saito (2010). "Accumulation  
664 of IL - 17 - Positive Cells in Decidua of Inevitable Abortion Cases." American Journal of  
665 Reproductive Immunology **64**(1): 4-11.
- 666 Nancy, P., E. Tagliani, C. S. Tay, P. Asp, D. E. Levy and A. Erlebacher (2012). "Chemokine  
667 Gene Silencing in Decidual Stromal Cells Limits T Cell Access to the Maternal-Fetal Interface."  
668 Science **336**(6086): 1317-1321.
- 669 Onishi, R. M. and S. L. Gaffen (2010). "Interleukin-17 and its target genes: mechanisms of  
670 interleukin-17 function in disease." Immunology **129**(3): 311-321.
- 671 Panopoulos, A. D. and S. S. Watowich (2008). "Granulocyte Colony-Stimulating Factor:  
672 molecular mechanisms of action during steady state and 'emergency' hematopoiesis." Cytokine  
673 **42**(3): 277-288.
- 674 Pappu, R., S. Rutz and W. Ouyang (2012). "Regulation of epithelial immunity by IL-17 family  
675 cytokines." Trends in Immunology **33**(7): 343-349.
- 676 Pavlicev, M., G. P. Wagner, A. R. Chavan, K. Owens, J. Maziarz, C. Dunn-Fletcher, S. G.  
677 Kallapur, L. Muglia and H. Jones (2017). "Single-cell transcriptomics of the human placenta:  
678 inferring the cell communication network of the maternal-fetal interface." Genome Res **27**(3):  
679 349-361.
- 680 Pinget, G. V., T. M. Corpuz, J. Stolp, E. L. Lousberg, K. R. Diener, S. A. Robertson, J. Sprent  
681 and K. E. Webster (2016). "The majority of murine  $\gamma\delta$  T cells at the maternal-fetal interface in  
682 pregnancy produce IL-17." Immunology And Cell Biology **94**: 623.
- 683 Plaks, V., T. Birnberg, T. Berkutzki, S. Sela, A. BenYashar, V. Kalchenko, G. Mor, E. Keshet,  
684 N. Dekel, M. Neeman and S. Jung (2008). "Uterine DCs are crucial for decidua formation during  
685 embryo implantation in mice." The Journal of Clinical Investigation **118**(12): 3954-3965.
- 686 Renfree, M. (1994). Endocrinology of Pregnancy, Parturition and Lactation in Marsupials.  
687 Marshall's Physiology of Reproduction. G. E. Lamming, Springer Netherlands: 677-766.

- 688 Robertson, S. A. and L. M. Moldenhauer (2014). "Immunological determinants of implantation  
689 success." *Int J Dev Biol* **58**(2-4): 205-217.
- 690 Robinson, M. D., D. J. McCarthy and G. K. Smyth (2010). "edgeR: a Bioconductor package for  
691 differential expression analysis of digital gene expression data." *Bioinformatics* **26**(1): 139-140.
- 692 Schall, T. J. (1991). "Biology of the rantes/sis cytokine family." *Cytokine* **3**(3): 165-183.
- 693 Schlafke, S. and A. C. Enders (1975). "Cellular basis of interaction between trophoblast and  
694 uterus at implantation." *Biol Reprod* **12**(1): 41-65.
- 695 Selwood, L. (2000). "Marsupial egg and embryo coats." *Cells Tissues Organs* **166**(2): 208-219.
- 696 Shuya, L. L., E. M. Menkhorst, J. Yap, P. Li, N. Lane and E. Dimitriadis (2011). "Leukemia  
697 Inhibitory Factor enhances endometrial stromal cell decidualization in humans and mice." *PLOS*  
698 *ONE* **6**(9): e25288.
- 699 Sonderegger, S., J. Pollheimer and M. Knöfler (2010). "Wnt Signalling in Implantation,  
700 Decidualisation and Placental Differentiation -- review." *Placenta* **31**(10): 839-847.
- 701 Supek, F., M. Bošnjak, N. Škunca and T. Šmuc (2011). "REVIGO Summarizes and Visualizes  
702 Long Lists of Gene Ontology Terms." *PLOS ONE* **6**(7): e21800.
- 703 Talukder, A. K., M. B. Rashid, M. S. Yousef, K. Kusama, T. Shimizu, M. Shimada, S. S. Suarez,  
704 K. Imakawa and A. Miyamoto (2018). "Oviduct epithelium induces interferon-tau in bovine  
705 Day-4 embryos, which generates an anti-inflammatory response in immune cells." *Scientific*  
706 *Reports* **8**(1): 7850.
- 707 Tarver, J. E., M. dos Reis, S. Mirarab, R. J. Moran, S. Parker, J. E. O'Reilly, B. L. King, M. J.  
708 O'Connell, R. J. Asher, T. Warnow, K. J. Peterson, P. C. J. Donoghue and D. Pisani (2016).  
709 "The Interrelationships of Placental Mammals and the Limits of Phylogenetic Inference."  
710 *Genome Biology and Evolution*.
- 711 Van Sinderen, M., E. Menkhorst, A. Winship, C. Cuman and E. Dimitriadis (2013).  
712 "Preimplantation Human Blastocyst-Endometrial Interactions: The Role of Inflammatory  
713 Mediators." *American Journal of Reproductive Immunology* **69**(5): 427-440.
- 714 Waclawik, A. and A. J. Ziecik (2007). "Differential expression of prostaglandin (PG) synthesis  
715 enzymes in conceptus during peri-implantation period and endometrial expression of carbonyl  
716 reductase/PG 9-ketoreductase in the pig." *Journal of Endocrinology* **194**(3): 499-510.
- 717 Wagner, G. P., K. Kin and V. J. Lynch (2012). "Measurement of mRNA abundance using RNA-  
718 seq data: RPKM measure is inconsistent among samples." *Theory Biosci* **131**(4): 281-285.
- 719 Wagner, G. P., K. Kin and V. J. Lynch (2013). "A model based criterion for gene expression  
720 calls using RNA-seq data." *Theory Biosci* **132**(3): 159-164.

- 721 Wagner, G. P., K. Kin, L. Muglia and M. Pavlicev (2014). "Evolution of mammalian pregnancy  
722 and the origin of the decidual stromal cell." Int J Dev Biol **58**(2-4): 117-126.
- 723 Wang, H. and S. K. Dey (2006). "Roadmap to embryo implantation: clues from mouse models."  
724 Nature Reviews Genetics **7**: 185.
- 725 Wang, W.-J., C.-F. Hao, L. Yi, G.-J. Yin, S.-H. Bao, L.-H. Qiu and Q.-D. Lin (2010). "Increased  
726 prevalence of T helper 17 (Th17) cells in peripheral blood and decidua in unexplained recurrent  
727 spontaneous abortion patients." Journal of Reproductive Immunology **84**(2): 164-170.
- 728 Whittington, C. M., D. O'Meally, M. K. Laird, K. Belov, M. B. Thompson and B. M. McAllan  
729 (2018). "Transcriptomic changes in the pre-implantation uterus highlight histotrophic nutrition of  
730 the developing marsupial embryo." Scientific Reports **8**(1): 2412.
- 731 Whyte, J. J., A. E. Meyer, L. D. Spate, J. A. Benne, R. Cecil, M. S. Samuel, C. N. Murphy, R. S.  
732 Prather and R. D. Geisert (2017). "Inactivation of porcine interleukin-1 $\beta$  results in failure of  
733 rapid conceptus elongation." Proceedings of the National Academy of Sciences.
- 734 Wu, H.-X., L.-P. Jin, B. Xu, S.-S. Liang and D.-J. Li (2014). "Decidual stromal cells recruit  
735 Th17 cells into decidua to promote proliferation and invasion of human trophoblast cells by  
736 secreting IL-17." Cellular And Molecular Immunology **11**: 253.
- 737 Ye, P., F. H. Rodriguez, S. Kanaly, K. L. Stocking, J. Schurr, P. Schwarzenberger, P. Oliver, W.  
738 Huang, P. Zhang, J. Zhang, J. E. Shellito, G. J. Bagby, S. Nelson, K. Charrier, J. J. Peschon and  
739 J. K. Kolls (2001). "Requirement of Interleukin 17 Receptor Signaling for Lung Cxc Chemokine  
740 and Granulocyte Colony-Stimulating Factor Expression, Neutrophil Recruitment, and Host  
741 Defense." The Journal of Experimental Medicine **194**(4): 519.
- 742 Yockey, L. J. and A. Iwasaki (2018). "Interferons and Proinflammatory Cytokines in Pregnancy  
743 and Fetal Development." Immunity **49**(3): 397-412.
- 744 Yockey, L. J., K. A. Jurado, N. Arora, A. Millet, T. Rakib, K. M. Milano, A. K. Hastings, E.  
745 Fikrig, Y. Kong, T. L. Horvath, S. Weatherbee, H. J. Kliman, C. B. Coyne and A. Iwasaki  
746 (2018). "Type I interferons instigate fetal demise after Zika virus infection." Science  
747 Immunology **3**(19).  
748
